# Supplementary material for: A 3D atlas of the dynamic and regional variation of pancreatic innervation in diabetes
Source: PubMed Central journal article supplement (PMC7557000; doi:10.1126/sciadv.aaz9124), 2020-10-09
Supplement: aaz9124_SM.pdf [file aaz9124_SM.pdf]

[advances.sciencemag.org/cgi/content/full/6/41/eaaz9124/DC1](https://advances.sciencemag.org/cgi/content/full/6/41/eaaz9124/DC1)

## Supplementary Materials for

### **A 3D atlas of the dynamic and regional variation of pancreatic innervation in diabetes**

Alexandra Alvarsson, Maria Jimenez-Gonzalez, Rosemary Li, Carolina Rosselot, Nikolaos Tzavaras, Zhuhao Wu, Andrew F. Stewart, Adolfo Garcia-Ocaña, Sarah A. Stanley\*

\*Corresponding author. Email: [sarah.stanley@mssm.edu](mailto:sarah.stanley@mssm.edu)

Published 9 October 2020, *Sci. Adv.* **6**, eaaz9124 (2020)  
DOI: 10.1126/sciadv.aaz9124

#### **The PDF file includes:**

Figs. S1 to S4  
Table S1

#### **Other Supplementary Material for this manuscript includes the following:**

(available at [advances.sciencemag.org/cgi/content/full/6/41/eaaz9124/DC1](https://advances.sciencemag.org/cgi/content/full/6/41/eaaz9124/DC1))

Movies S1 to S21

## Supplementary Figures

### Figure S1. $\beta$ -cell distribution and innervation in C57BL/6 mice.

A) Distribution of insulin+ islets at increasing distance from the nearest nerve (left axis) and median distance from the nearest nerve (right axis) in C57BL/6 mice.  $P < 0.0001$ , Mann-Whitney test.  $N=5$ , islets/group: 25310, 10030 and 15280.

B) Mean volume of insulin+ islets located  $< 1.6 \mu\text{m}$  or  $> 1.6 \mu\text{m}$  from the nearest nerve across the entire pancreas (T), in the duodenal (D) and splenic (S) regions. Kruskal-Wallis test:  $p < 0.0001$ . Dunn's test: Total  $< 1.6 \mu\text{m}$  vs.  $> 1.6 \mu\text{m}$ :  $p < 0.0001$ ; D  $< 1.6 \mu\text{m}$  vs.  $> 1.6 \mu\text{m}$ :  $p < 0.0001$ ; S  $< 1.6 \mu\text{m}$  vs.  $> 1.6 \mu\text{m}$ :  $p < 0.0001$ ; D  $> 1.6 \mu\text{m}$  vs. S  $> 1.6 \mu\text{m}$ :  $p < 0.0001$ ;  $N=5$  samples, islets/group: 770, 11885, 325, 4690, 445, 7195.

C) Proportion of innervated (NF200+) insulin+ islets with volumes  $< 10,000 \mu\text{m}^3$ ,  $10,000\text{--}49,999 \mu\text{m}^3$ ,  $50,000\text{--}500,000 \mu\text{m}^3$  or  $> 50,000 \mu\text{m}^3$ .

D) Number of  $\beta$ -cells contacting NF200+ nerves per insulin+ islet based on size. Small:  $< 10 \beta$ -cells, medium: 10-100  $\beta$ -cells, large  $> 100 \beta$ -cells. Kruskal-Wallis test:  $p = 0.0175$ . Dunn's test:  $p = 0.0103$ , small vs. large.

E) Percentage of  $\beta$ -cells contacting NF200+ nerves per insulin+ islet based on size. Small:  $< 10 \beta$ -cells, medium: 10-100  $\beta$ -cells, large  $> 100 \beta$ -cells. Kruskal-Wallis test:  $p = 0.3041$ .

F) Large and thin nerve fibers expressing NF200 (magenta).

G) Analysis of innervation (yellow) and  $\beta$ -cells (red) (left panel) and the detection of nerve/ $\beta$ -cell contacts by distance transformation (left panel).  $\beta$ -cell clusters in cyan are touching the nerve surface (distance: 0).

Data are shown as mean  $\pm$  SEM, or as median  $\pm$  95% confidence interval where indicated. T: Total; D: Duodenal; S: Splenic.

**Figure S2.  $\beta$ -cell distribution and innervation in nondiabetic and diabetic NOD mice.**

A) Correlation between insulin+ islet number (left axis) and  $\beta$ -cell volume (right axis) and blood glucose in NOD mice. Islet number, T:  $p=0.0009$ ; D:  $p=0.015$ ; S:  $p=0.0034$ ; Islet V, T:  $p=0.0021$ ; D:  $p=0.0010$ ; S:  $p=0.0137$ , linear regression. N=14.

B) Correlation between blood glucose and exocrine nerve volume. T:  $p=0.9520$ , D:  $p=0.7351$ , S:  $p=0.5316$ , linear regression. N=15.

C) Correlation between blood glucose and endocrine nerve volume corrected for islet volume (right axis) and endocrine nerve volume per insulin+ islet (left axis). Nerve V/Islet V: T:  $p=0.1540$ ; D:  $p=0.2217$ ; S:  $p=0.0436$ ; Nerve V per islet, T:  $p=0.1784$ ; D:  $p=0.4104$ ; S:  $p=0.2396$ , linear regression. N=15.

D) Distribution of insulin+ islets at increasing distance from the nearest nerve (left axis) and median distance from the nearest nerve (right axis) in NOD mice. Kruskal-Wallis test:  $p<0.001$ ; Dunn's test: nondiabetic S vs. diabetic S:  $p<0.001$ ; nondiabetic D vs. S:  $p<0.001$ ; diabetic D vs. S:  $p<0.001$ . N=8 nondiabetic, 7 diabetic. Islets/group: 9616, 5486, 4130, 4739, 3473, 1293.

E) Mean volume of insulin+ islets  $<1.6 \mu\text{m}$  and  $>1.6 \mu\text{m}$  from the nearest nerve in NOD mice. Kruskal-Wallis test:  $p<0.001$ , Dunn's test,  $<1.6 \mu\text{m}$ : nondiabetic T vs. diabetic T:  $p<0.001$ ; nondiabetic D vs. nondiabetic S:  $p<0.001$ ; nondiabetic S vs. diabetic S:  $p<0.001$ ;  $>1.6 \mu\text{m}$ : nondiabetic T vs. diabetic T:  $p<0.001$ ; nondiabetic D vs. S:  $p<0.001$ ; nondiabetic D vs. diabetic D:  $p<0.001$ ; diabetic D vs. S:  $p=0.0096$ . N=8 nondiabetic, 7 diabetic. Islets/group: 901, 4585, 500, 3605, 312, 3163, 199, 1187, 1401, 8190, 511, 4350.

F) Proportion of innervated (NF200+) insulin+ islets with volumes  $<10,000 \mu\text{m}^3$ ,  $10,000\text{--}49,999 \mu\text{m}^3$ ,  $50,000\text{--}500,000 \mu\text{m}^3$  or  $>50,000 \mu\text{m}^3$  in NOD mice.

Data are shown as mean $\pm$ SEM, or as median $\pm$ 95% confidence interval where indicated. T: Total; D: Duodenal; S: Splenic.

### Figure S3. $\beta$ -cell distribution and innervation in STZ-treated mice.

- A) Correlation between insulin+ islet number (left axis),  $\beta$ -cell volume (right axis) and blood glucose in control or STZ-treated mice. Islet volume, total:  $p=0.0055$ , duodenal:  $p=0.0012$ , splenic:  $p=0.0187$ ; Islets per  $\text{mm}^3$ , total:  $p=0.0258$ , duodenal:  $p=0.0091$ , splenic:  $p=0.823$ , linear regression.  $N=18$ .
- B) Correlation between exocrine nerve volume and blood glucose across in control or STZ-treated mice. Total:  $p=0.0719$ , duodenal:  $p=0.3879$ , splenic:  $p=0.4624$ , linear regression.  $N=15$ .
- C) Correlation between blood glucose and endocrine nerve volume corrected for islet volume (left axis) or endocrine nerve volume per insulin+ islet (right axis) in control or STZ-treated mice. Nerve V / Islet V, total:  $p=0.0149$ , duodenal:  $p=0.6467$ , splenic:  $p=0.1547$ ; Nerve V per islet, total:  $p=0.0396$ , duodenal:  $p=0.3790$ , splenic:  $p=0.200$ , linear regression.  $N=15$ .
- D) Insulin+ islet volume distribution (left axis) and median insulin+ islet volume (right axis) in control or STZ-treated mice. Kruskal-Wallis test:  $p<0.001$ ; Dunn's test: Control T vs. STZ day 15 T:  $p<0.001$ ; Control D vs. STZ day 5 D,  $p=0.0027$ ; Control D vs. STZ day 15 D,  $p<0.001$ ; STZ day 5 T vs. STZ day 15 T,  $p<0.001$ ; STZ day 5 D vs. STZ day 5 S,  $p<0.0020$ ; STZ day 5 S vs. STZ day 15 S,  $p<0.001$ ; STZ day 15 D vs. STZ day 15 S,  $p<0.001$ . Islets/group: 10479, 4682, 5797, 10091, 5162, 4929, 14380, 7543 and 6837.
- E) Mean volume of insulin+ islets located  $<1.6 \mu\text{m}$  or  $>1.6 \mu\text{m}$  from the nearest nerve in control or STZ-treated mice. Kruskal-Wallis test:  $p<0.001$ . For islets  $<1.6 \mu\text{m}$  from innervation: Dunn's test: Control T vs. STZ day 15 T;  $p<0.001$ ; Control D vs. Control S, STZ day 5 D, STZ day 15 D,  $p<0.001$ ; STZ day 5 T vs. STZ day 15 T,  $p<0.001$ ; STZ day 5 S vs. STZ day 15 S,  $p<0.001$ ; STZ day 15 D vs. STZ day 15 S,  $p<0.001$ . For islets  $>1.6 \mu\text{m}$  from innervation: Control T vs. STZ day 5 T,  $p<0.001$ ; Control D vs. STZ day 5 D,  $p<0.001$ ; STZ day 5 T vs. STZ day 15 T,  $p<0.001$ ; STZ day 5 D vs. STZ day 5 S,  $p<0.001$ ; STZ day 5 S vs. STZ day 15 S,  $p<0.001$ ; STZ day 15 D vs. STZ day 15 S,  $p<0.001$ . Between STZ day 5 T, D and S:  $p<0.001$ . Between STZ day 15 T, D and S:  $p<0.001$ . Control T vs. STZ day 5 T, between islets  $<1.6 \mu\text{m}$  and  $>1.6 \mu\text{m}$ :  $p<0.001$  for Control, STZ day 5 and STZ day 15 respectively, denoted by \*\*\* on bars. Islets/group: 237, 6384, 271, 4355, 508, 5680, 217, 3979, 145, 2614, 362, 3789, 307, 7233, 512, 5548, 819, 5395.
- F) Proportion of innervated (NF200+) insulin+ islets with volumes  $<10,000 \mu\text{m}^3$ ,  $10,000\text{--}49,999 \mu\text{m}^3$ ,  $50,000\text{--}500,000 \mu\text{m}^3$  or  $>50,000 \mu\text{m}^3$  in control or STZ-treated mice.

Data are shown as mean $\pm$ SEM, or as median $\pm$ 95% confidence interval where indicated. T: Total; D: Duodenal; S: Splenic.

**Figure S4. Neuronal, endocrine and vascular markers in cleared pancreatic mouse tissue.**

Maximum projections of small pancreatic samples cleared with iDISCO+ and immunolabeled for insulin with

A) NF200

B) Sympathetic marker, tyrosine hydroxylase (TH)

C) Parasympathetic marker, vesicular acetylcholine transporter (VACht)

D) Sensory marker, Transient receptor potential cation channel subfamily V member 1 (TRPV1)

E) Pan-neuronal marker, synapsin

F) Glucagon

G) Somatostatin (SST)

H) Exocrine pancreas marker, mucin 1 (Muc1)

Maximum projections of small pancreatic samples cleared with a modified protocol for ECI and immunolabeled for insulin and vasculature using:

I) Alexa-488 dextran

J) Alexa-647 CD31

Scale bars: 50  $\mu$ m.

**Figure S1**

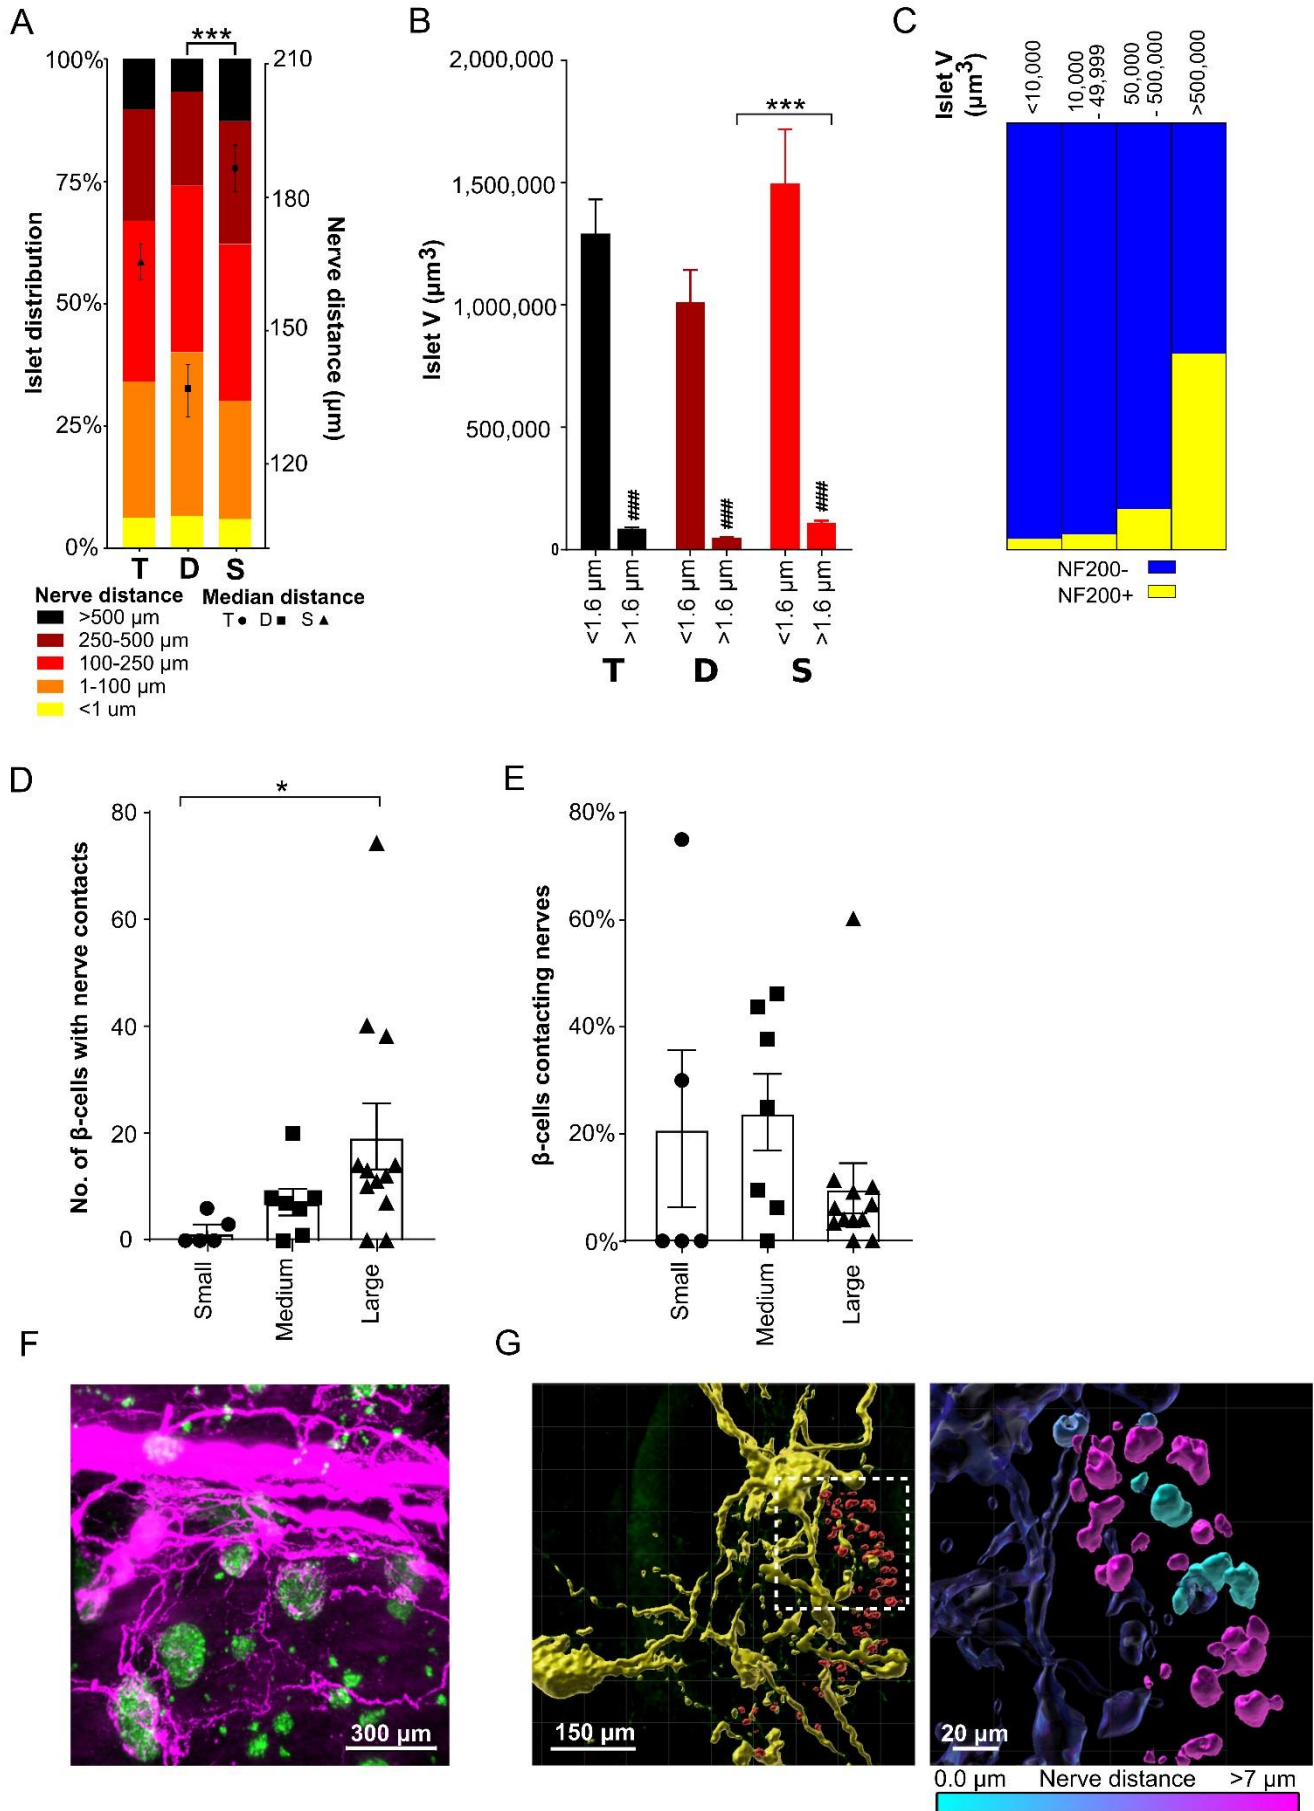

**Figure S2**

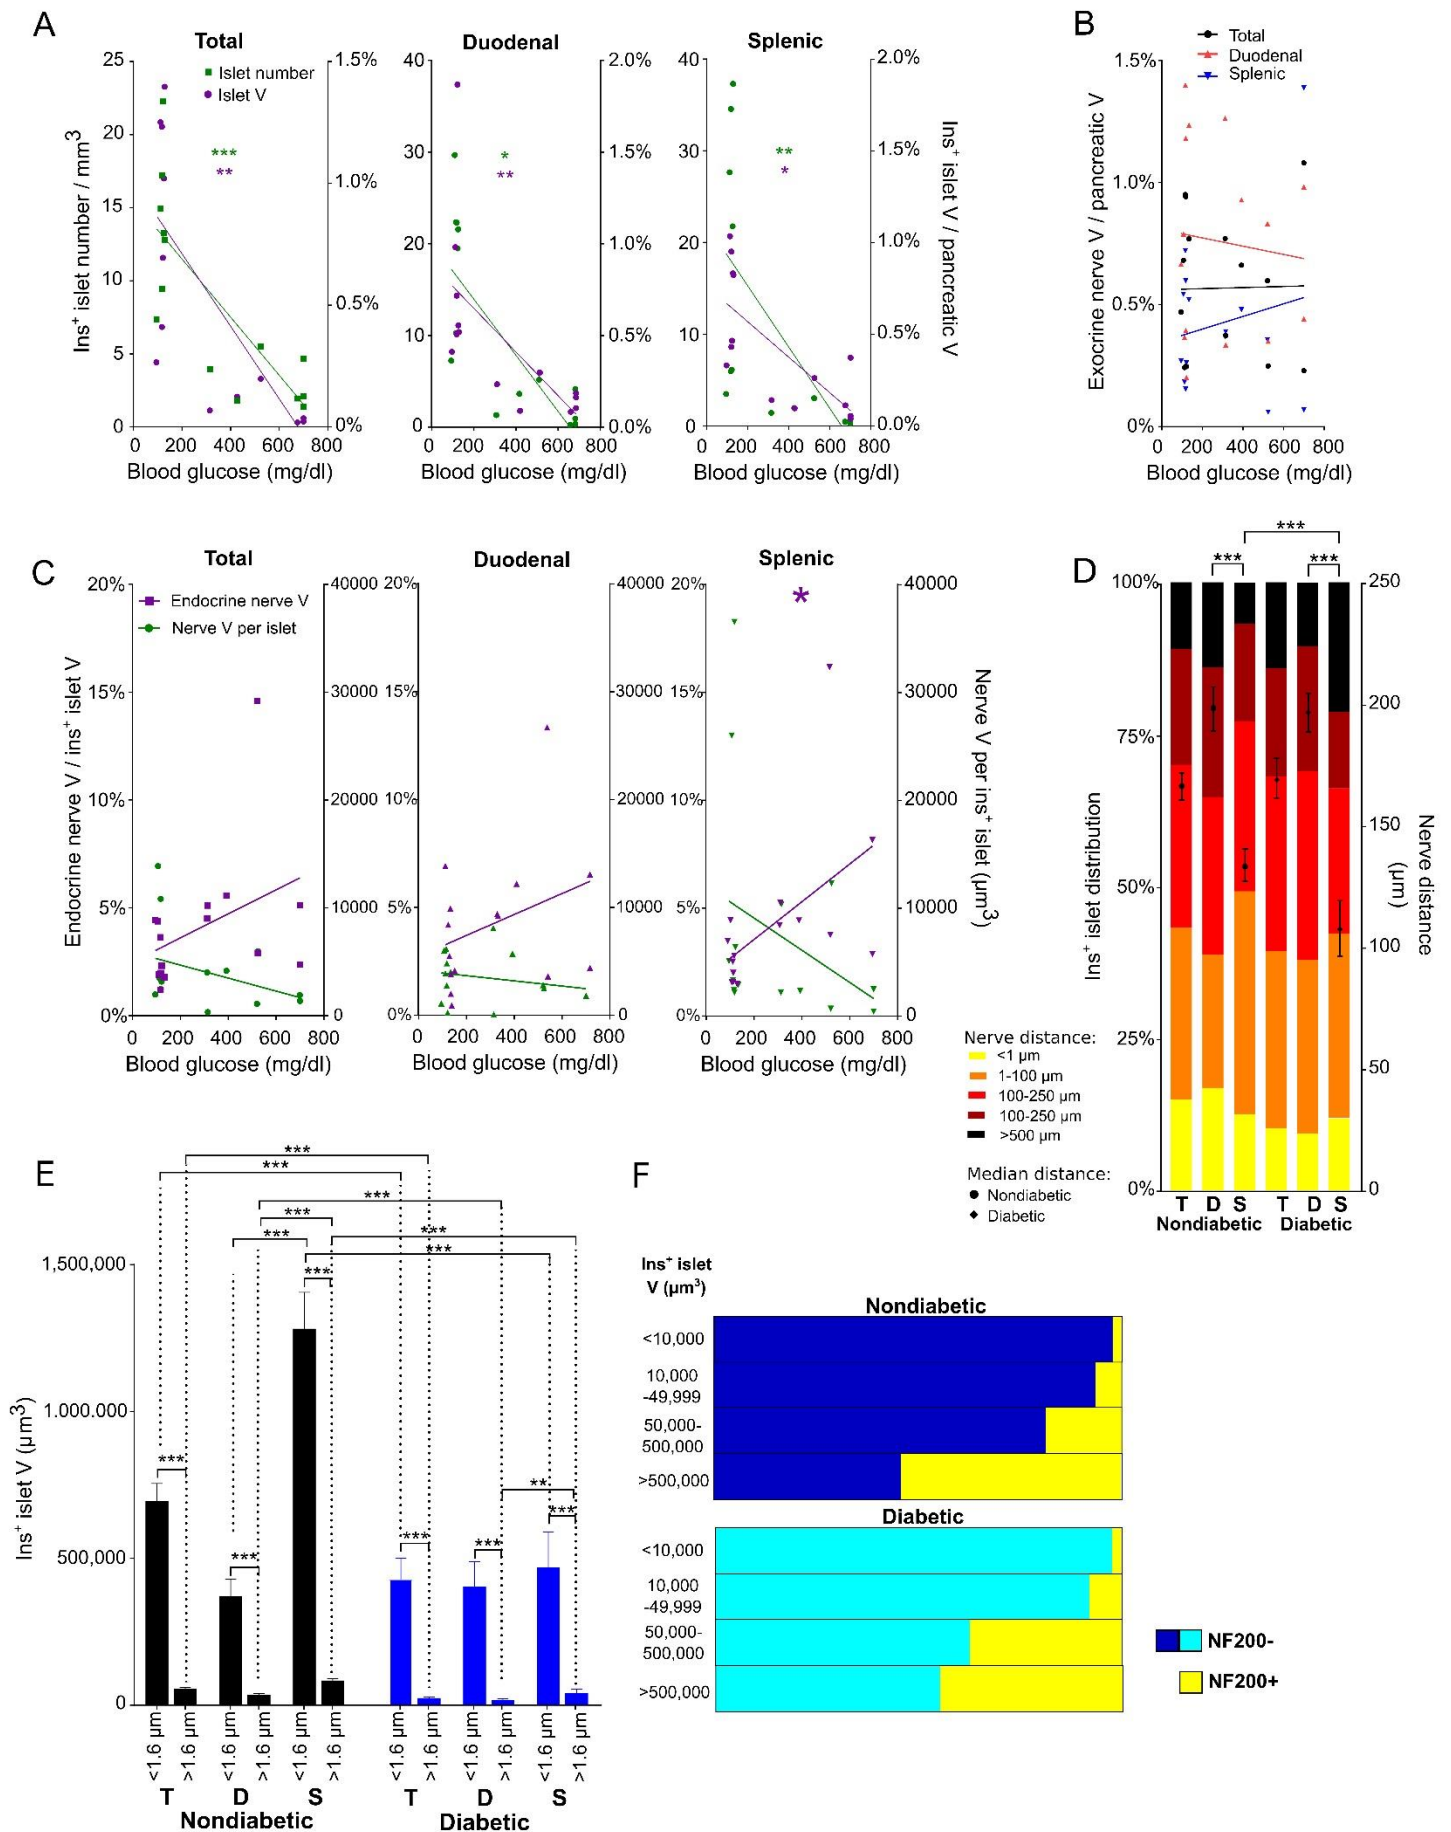

**Figure S3**

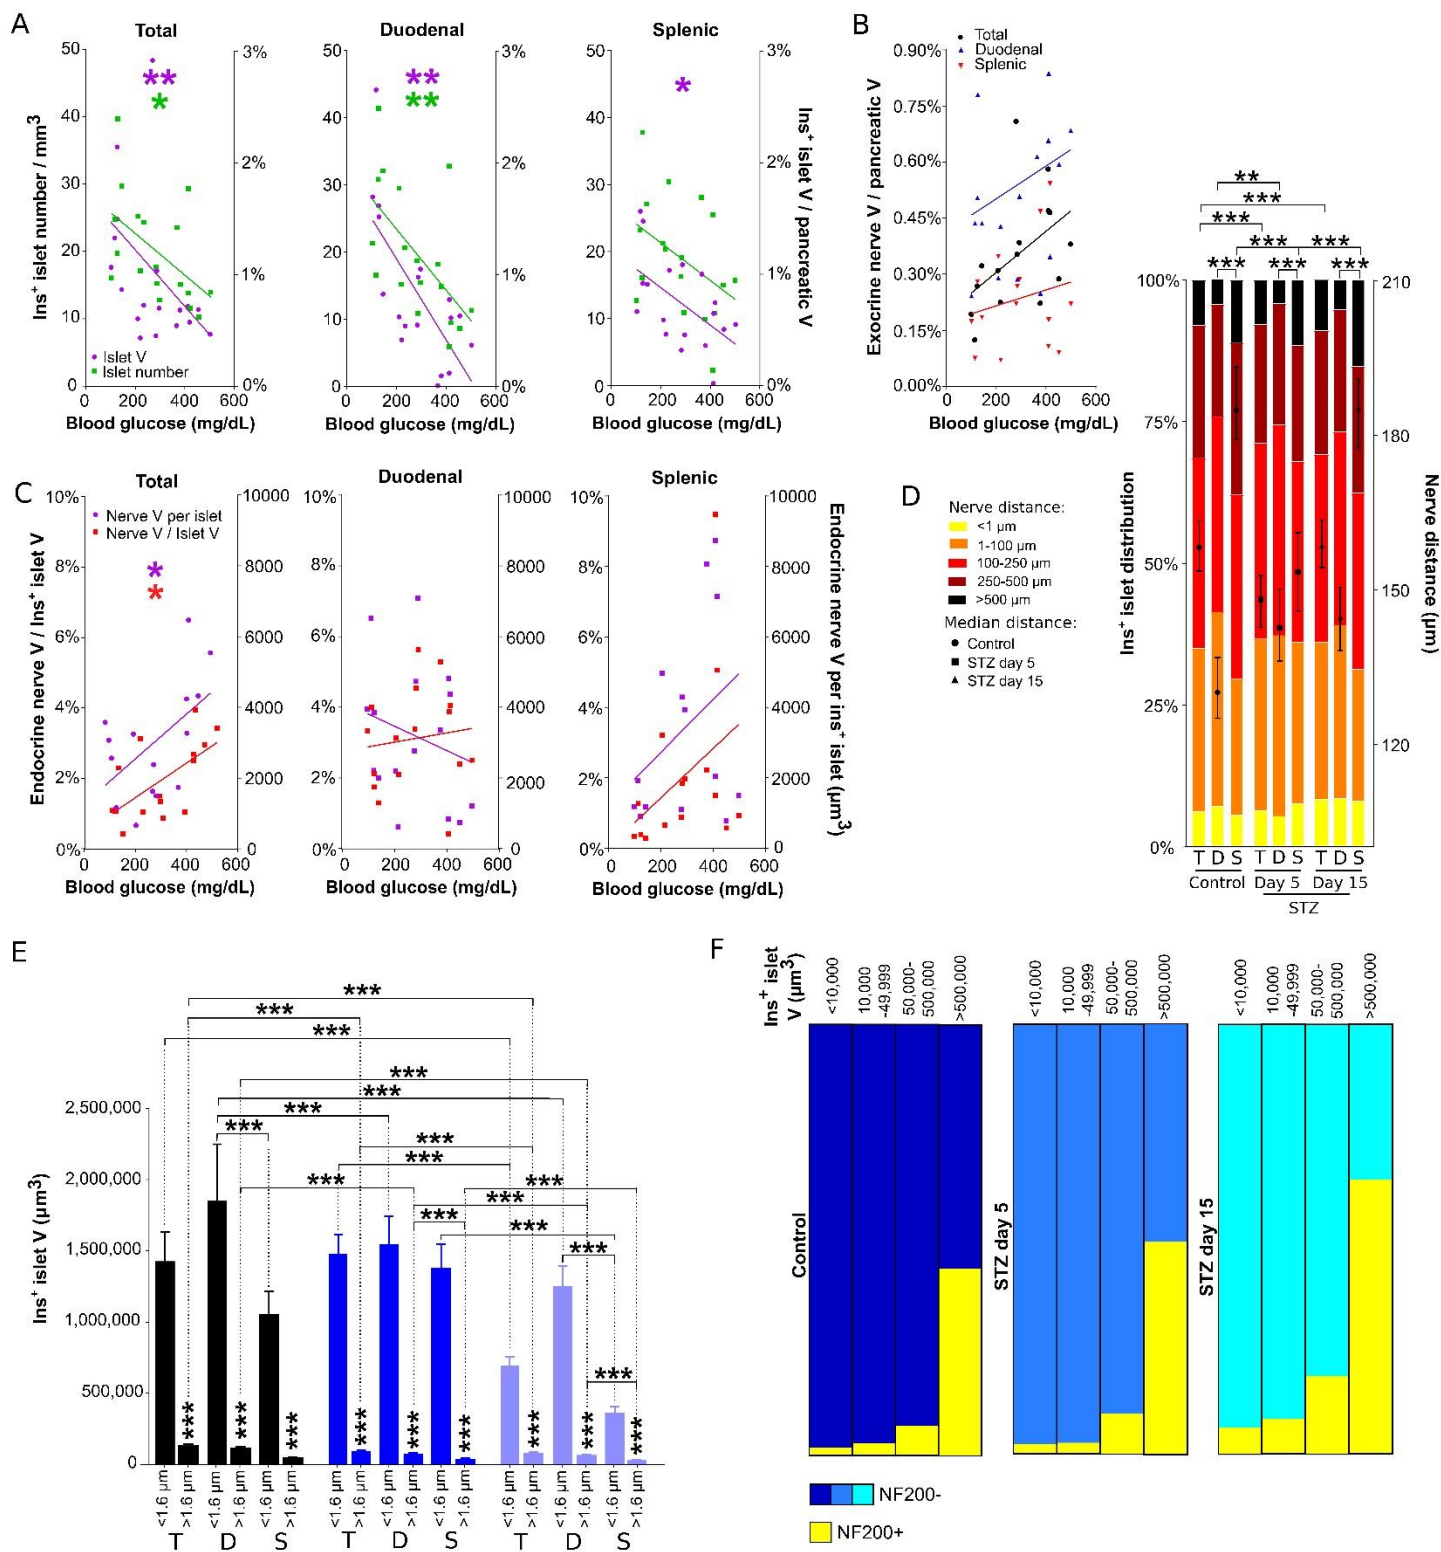



Figure S4

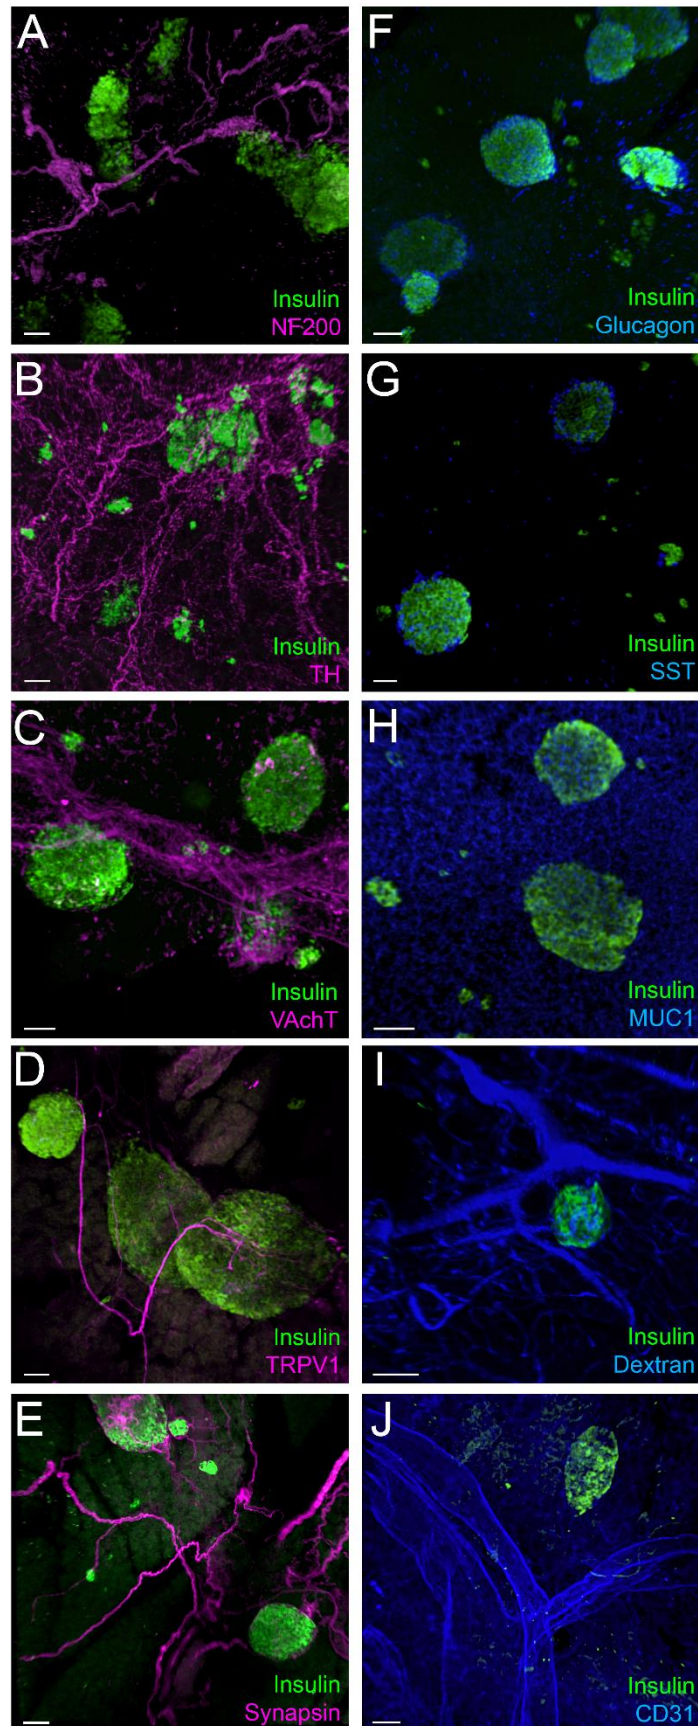

**Table S1. List of evaluated antibodies.**

| <b>Primary antibodies</b>                                        |                       |                     |                           |                          |                       |                    |
|------------------------------------------------------------------|-----------------------|---------------------|---------------------------|--------------------------|-----------------------|--------------------|
| <b>Target</b>                                                    | <b>Dilution</b>       | <b>Host species</b> | <b>Manufacturer</b>       | <b>Product number</b>    | <b>RRID number</b>    |                    |
| Insulin                                                          | 1:1000                | Guinea pig          | Dako / Agilent            | A0564                    | AB_10013624           |                    |
| Neurofilament 200 kDA                                            | 1:500                 | Rabbit              | Sigma-Aldrich             | N4142                    | AB_477272             |                    |
| Tyrosine Hydroxylase                                             | 1:500                 | Rabbit              | Millipore                 | AB152                    | AB_390204             |                    |
| Vesicular Acetylcholine Transporter                              | 1:500                 | Rabbit              | Synaptic Systems          | 139 103                  | AB_887864             |                    |
| Glucagon                                                         | 1:200                 | Rabbit              | Cell Signaling Technology | 2760                     | AB_659831             |                    |
| Glucagon                                                         | 1:2000                | Mouse               | Sigma-Aldrich             | G2654                    | AB_259852             |                    |
| Somatostatin                                                     | 1:1000                | Goat                | Santa Cruz                | SC7819                   | AB_2302603            |                    |
| Mucin 1                                                          | 1:200                 | Armenian hamster    | Thermo Fisher Scientific  | MA5-11202                | AB_11000874           |                    |
| Transient receptor potential cation channel subfamily V member 1 | 1:500                 | Rabbit              | Alomone labs              | ACC-030                  | AB_2313819            |                    |
| Synapsin                                                         | 1:500                 | Rabbit              | Cell Signaling Technology | 5297                     | AB_2616578            |                    |
| Insulin                                                          | 1:500                 | Rat                 | R&D Systems               | MAB1417                  | AB_2126533            |                    |
| CD31                                                             | 50 mg/ml              | Rat                 | Biologend                 | 102515                   | AB_2161030            |                    |
| <b>Secondary antibodies</b>                                      |                       |                     |                           |                          |                       |                    |
| <b>Target</b>                                                    | <b>Conjugate</b>      | <b>Dilution</b>     | <b>Host species</b>       | <b>Manufacturer</b>      | <b>Product number</b> | <b>RRID number</b> |
| Guinea pig                                                       | Alexa Fluor® 647      | 1:500               | Donkey                    | Jackson ImmunoResearch   | 706-605-148           | AB_2340476         |
| Rabbit                                                           | Alexa Fluor® 647      | 1:500               | Donkey                    | Jackson ImmunoResearch   | 711-605-152           | AB_2492288         |
| Rabbit                                                           | Alexa Fluor® 594      | 1:500               | Donkey                    | Invitrogen               | A-21207               | AB_141637          |
| Rabbit                                                           | Alexa Fluor® 546      | 1:500               | Donkey                    | Thermo Fisher Scientific | A10040                | AB_2534016         |
| Mouse                                                            | Alexa Fluor® Plus 647 | 1:500               | Donkey                    | Invitrogen               | A32787                | AB_2762830         |
| Goat                                                             | Alexa Fluor® 546      | 1:500               | Donkey                    | Thermo Fisher Scientific | A-11056               | AB_2534103         |
| Armenian Hamster                                                 | Alexa Fluor® 594      | 1:500               | Goat                      | Jackson ImmunoResearch   | 127-585-099           | AB_2338998         |
| Rat                                                              | DyLight® 550          | 1:500               | Donkey                    | Thermo Fisher Scientific | SA5-10027             | AB_2556607         |
| Rat                                                              | Alexa Fluor® 488      | 1:500               | Donkey                    | Thermo Fisher Scientific | A-21208               | AB_25357794        |
